# Supplementary material for: Identification of an Autophagy-Related Signature Based on Whole Bone Marrow Sequencing for the Prognosis and Immune Microenvironment Characterization of Multiple Myeloma
Source: Hindawi journal article supplement (doi:10.1155/2022/3922739), 2022-05-29

**A**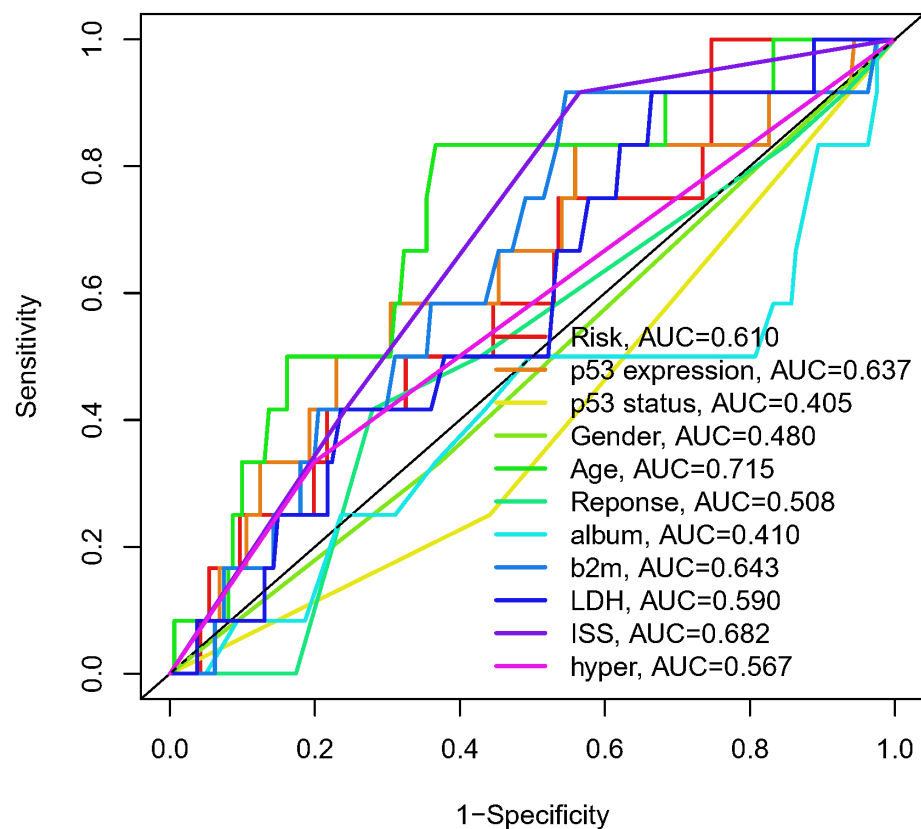**B**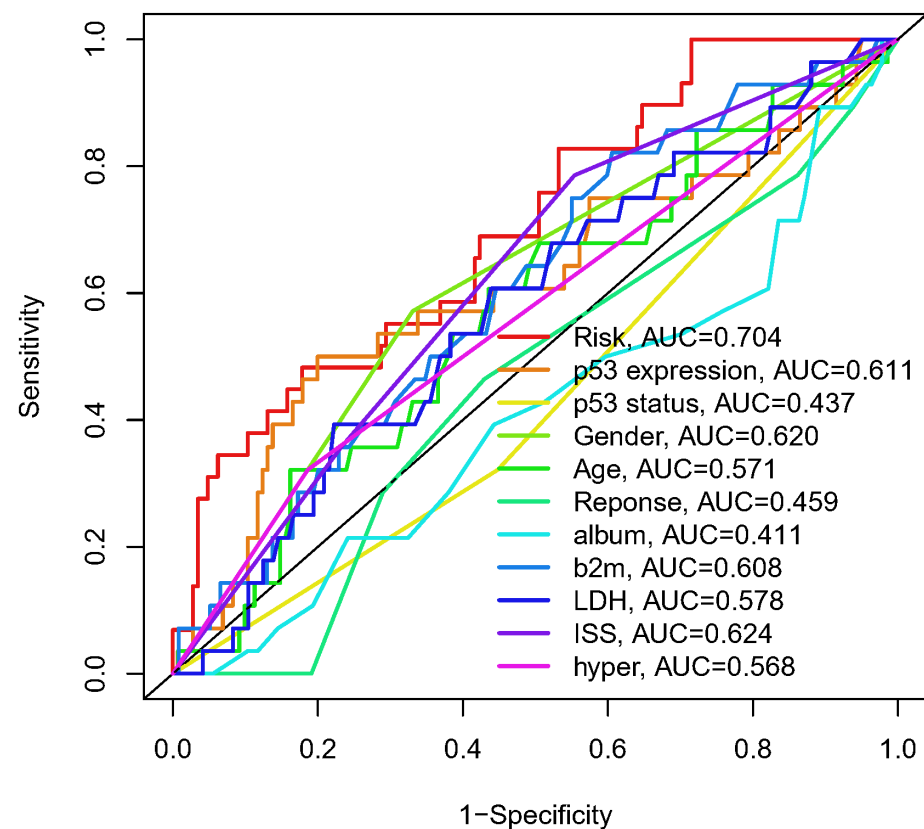**C**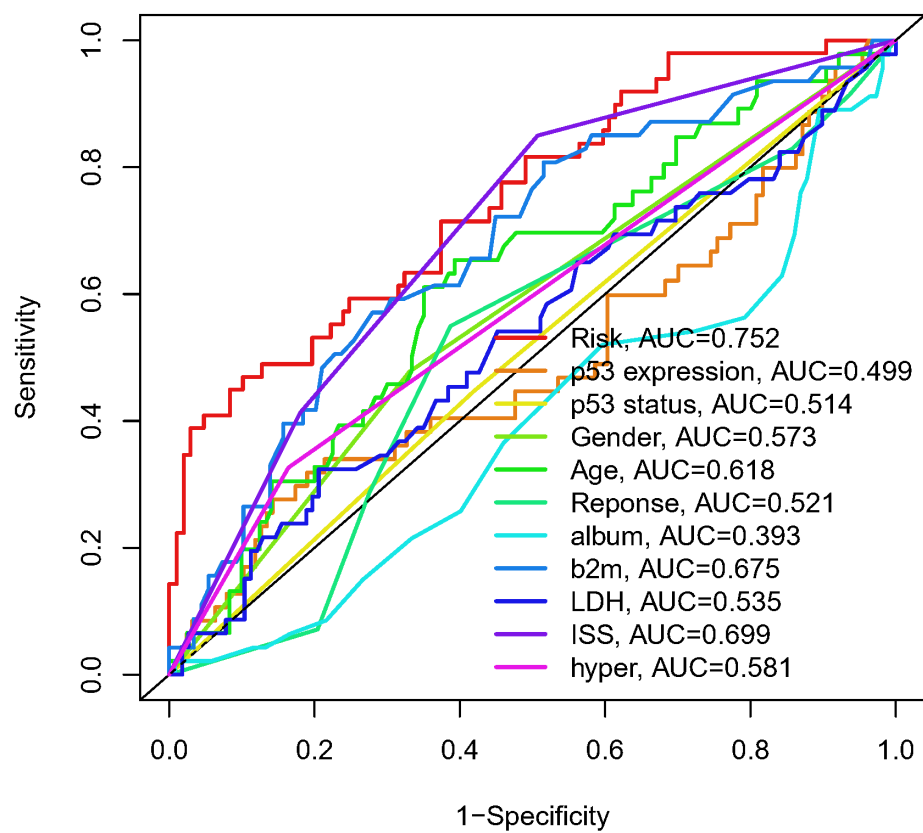**D**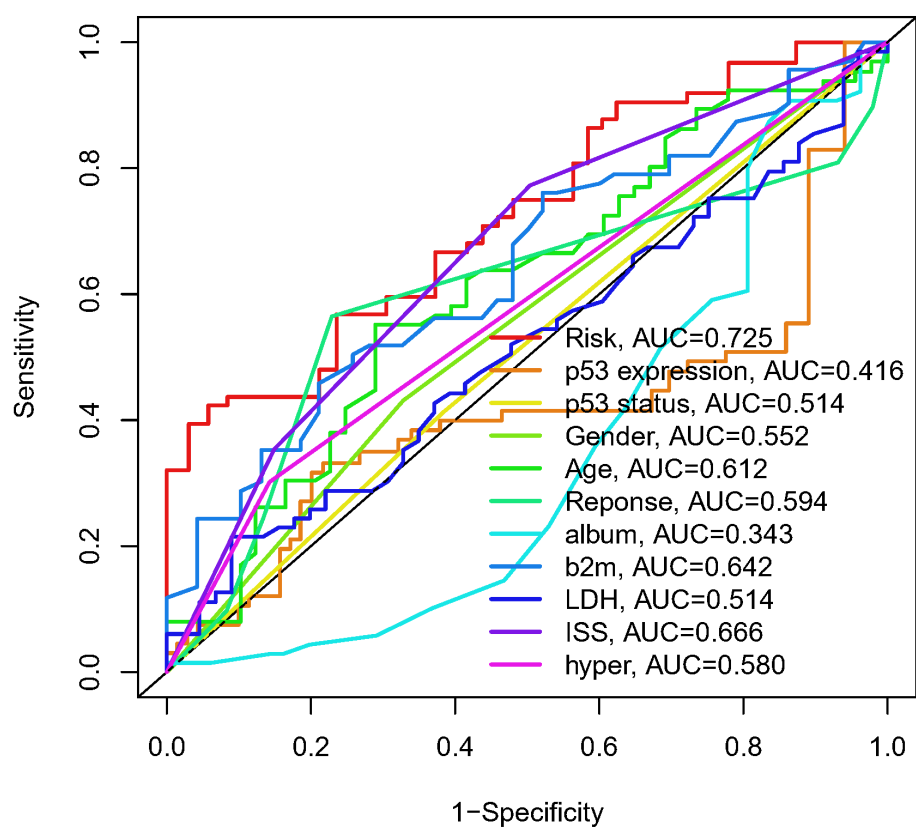

Supplement: f2 [file 3922739.f2.pdf]
